# Supplementary material for: NIR persistent luminescence phosphor Zn1.3Ga1.4Sn0.3O4:Yb3+,Er3+,Cr3+ with 980 nm laser excitation
Source: Royal Society of Chemistry journal article supplement (doi:10.1039/c9tc03882e), 2019-01-01
Supplement: c9tc03882e1.pdf [file c9tc03882e1.pdf]

## Supporting Information

### NIR Persistent Luminescence of Phosphor $\text{Zn}_{1.3}\text{Ga}_{1.4}\text{Sn}_{0.3}\text{O}_4$ :

### $\text{Yb}^{3+}$ , $\text{Er}^{3+}$ , $\text{Cr}^{3+}$ with Excitation of 980 nm Laser

Jin qin, Jinmeng Xiang, Hao Suo, Yuhua Chen, Zhiyu Zhang, Xiaoqi Zhao, Yanfang Wu, Chongfeng Guo\*

National Key Laboratory of Photoelectric Technology and Functional Materials (Culture Base) in Shaanxi Province, National Photoelectric Technology and Functional Materials & Application of Science and Technology International Cooperation Base, Institute of Photonics & Photon-Technology, Northwest University, Xi'an, 710069, China;

\* Corresponding author

E-mail: guocf@nwu.edu.cn (Prof. Guo);

Tel & Fax: ±86-29-88302661

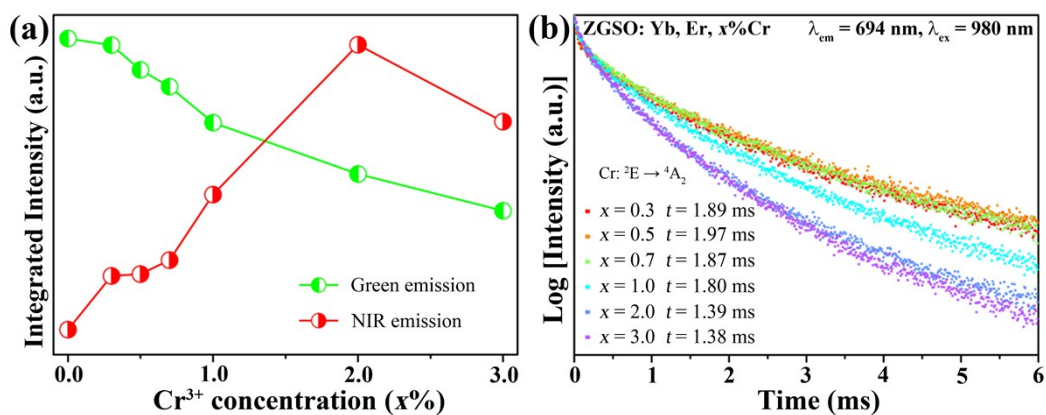

**Figure S1.** (a) the integrated intensity of green/NIR emission band of ZGSO: Yb, Er, x%Cr ( $x = 0-3.0$ ); (b) decay curves of  $\text{Cr}^{3+}$ :  $^2\text{E}$  ( $\lambda_{\text{em}} = 694 \text{ nm}$ ) state in ZGSO: Yb, Er, x%Cr ( $x = 0-3.0$ ) samples under the 980 nm laser excitation.

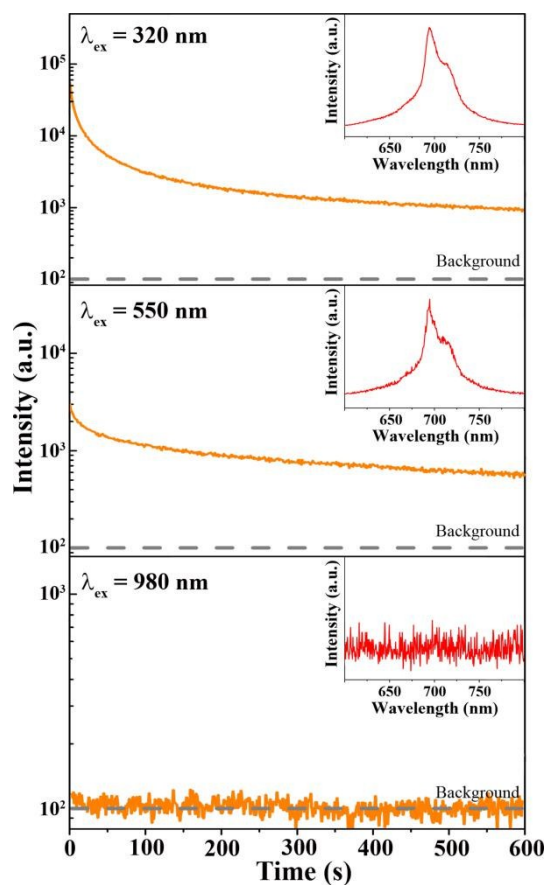

**Figure S2.** *PersL* intensity decay curves of 694 nm transition in ZGSO: Cr phosphor at 10s after ceasing irradiation for 10 min with 320, 550 and 980 nm light. The inset provides the corresponding *PersL* spectrum of sample at 30 s after 10 minutes of irradiation.

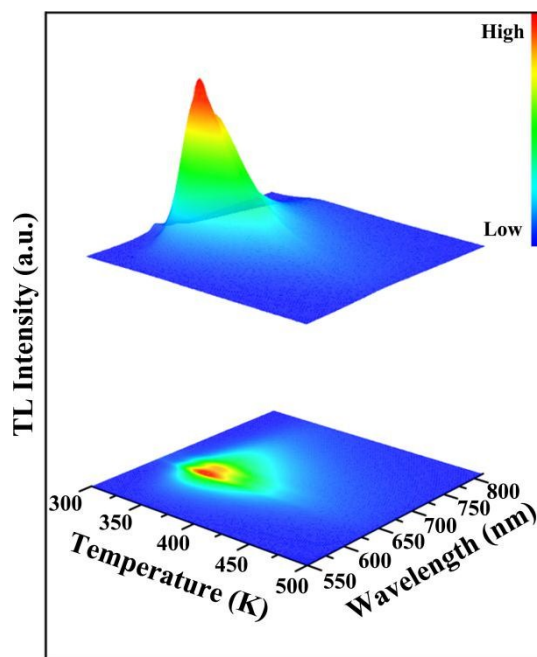

**Figure S3.** The *three-dimensional* and *corresponding contour mapping* TL spectra of ZGSO: Cr phosphor after irradiated by 254 nm UV light for 10 min;

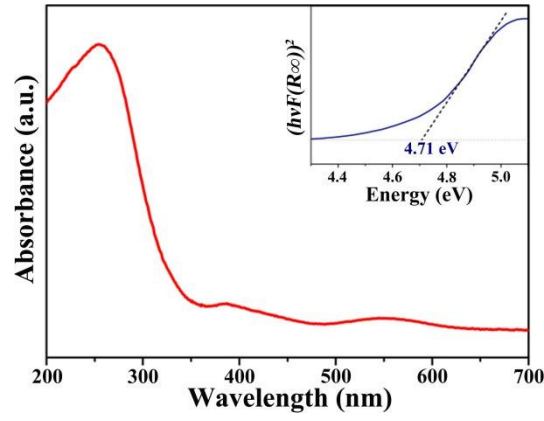

**Figure S4.** Diffuse absorption spectrum and (inset) the corresponding  $(hvF(R_{\infty}))^2-hv$  plot of  $\text{Zn}_{1.3}\text{Ga}_{1.4}\text{Sn}_{0.3}\text{O}_4$ : Cr, Yb, Er phosphor. The optical band-gap ( $E_g$ ) of  $\text{Zn}_{1.3}\text{Ga}_{1.4}\text{Sn}_{0.3}\text{O}_4$ : Cr, Yb, Er can be estimated by the Kubelka-Munk formula:  $a = -Lg(R)$  and  $F(R_{\infty}) = S \times (1 - R)^2 / (2 \times R)$  as well as  $(hv \times F(R_{\infty}))^2 = A \times (hv - E_g)$ , where  $a$ ,  $R$  and  $S$  are the absorption, reflection and diffusion coefficients, respectively,  $A$  denotes proportional constant. According to the intercepts of the blue dashed straight line, the value of  $E_g$  is calculated to be 4.71 eV.
